# Supplementary material
Source: MDPI journal article supplement (https://www.mdpi.com/1424-2818/12/4/163)
Supplement: s1 [file s1]

## Sheet: MEASUREMENTS
SPECIES	English Name	CATALOG #	SEX	R or L	GL Tibio(mm)	Shaft width(mm)	WidthTibio(mm)	DepthTibio(mm)
Aegolius acadicus	N. Saw-whet Owl	NCSM 17733	♂	L	47.9	1.74	5.6	4.6
Aegolius acadicus	N. Saw-whet Owl	NCSM 20656	♂	L	43.97	1.7	5.5	4.4
Aegolius acadicus	N. Saw-whet Owl	NCSM 17813	♂	R	45.53	1.7	5.1	4.6
Aegolius acadicus	N. Saw-whet Owl	NCSM 16959	♀	R	50.33	2.12	5.7	4.7
Aegolius funereus	Boreal Owl	USNM 610424	♂	L	48.1	2.8	6.1	5
Aegolius funereus	Boreal Owl	USNM 610425	♂	L	49	2.5	5.9	4.8
Aegolius funereus	Boreal Owl	USNM 410426	♂	L	48.1	2.5	5.9	4.8
Aegolius funereus	Boreal Owl	USNM 410427	♂	L	47.9	2.6	6.1	4.8
Asio capensis	Marsh Owl	USNM 488160	♂	L	87.6	3.9	9.3	7.6
Asio capensis	Marsh Owl	USNM 488161	♂	L	84	3.8	9.1	7.6
Asio capensis	Marsh Owl	USNM 488162	♀	L	89.3	3.9	9.1	7.7
Asio capensis	Marsh Owl	USNM 431903	♂	L	87.1	3.8	8.1	7.4
Asio flammeus	Short-eared Owl	NCSM 19103	♀	L	86.09	3.03	9.6	7.6
Asio flammeus	Short-eared Owl	NCSM 20785	♀	R	86.33	2.97	9.5	7.8
Asio flammeus	Short-eared Owl	USNM 553265	♂	L	80.4	4.1	8.4	7.4
Asio flammeus	Short-eared Owl	USNM 501312	♂	L	77.9	3.9	8.2	7
Athene cunicularia	Burrowing Owl	USNM 610972	♀	L	65.3	2.9	6.7	5.8
Athene cunicularia	Burrowing Owl	USNM 614648	♂	L	69.6	3.3	7.5	6.6
Athene cunicularia	Burrowing Owl	FMNH 368700	♀	L	61.7	3	7.2	5.7
Athene cunicularia	Burrowing Owl	FMNH 317301	♀	L	68.7	3.1	7.2	6.4
Athene noctua	Little Owl	USNM 603597	♂	L	51.7	2.6	6.7	5.7
Athene noctua	Little Owl	USNM 603600	♂	L	51.9	2.7	6.7	5.4
Athene noctua	Little Owl	USNM 603596	♀	L	55.8	2.9	6.8	5.5
Athene noctua	Little Owl	USNM 490358	♀	L	51.2	3	6.7	5.3
Athene brama	Spotted Owlet	FMNH 107546	♀	L	52.9	2.7	6.6	5.4
Athene brama	Spotted Owlet	USNM 343988	♂	L	50.2	2.7	6.6	5.3
Athene brama	Spotted Owlet	USNM 292222	♀	L	51.3	2.7	6.5	5.2
Bubo bubo	Eurasian Eagle-Owl	USNM 343007	♂	L	134.22	5.22	17.6	14.6
Bubo bubo	Eurasian Eagle-Owl	USNM 321113	♂	L	141.37	5.56	17.9	14.6
Bubo bubo	Eurasian Eagle-Owl	USNM 343155	♂	L	138.49	5.09	17	13.8
Bubo virginianus	Great Horned Owl	NCSM 23039	♀	L	121.44	5.21	15.9	13.1
Bubo virginianus	Great Horned Owl	NCSM 16353	♂	R	125.36	4.93	15.4	12.7
Bubo virginianus	Great Horned Owl	NCSM 7690	♂	L	125.26	5.38	15.3	12.9
Bubo virginianus	Great Horned Owl	NCSM 6589	♂	L	122.75	5.5	15.4	13.6
Bubo virginianus	Great Horned Owl	NCSM 8245	♂	R	121.49	5	15.2	12.6
Bubo virginianus	Great Horned Owl	NCSM 7398	♀	L	125.11	5.31	16.2	13.5
Bubo virginianus	Great Horned Owl	NCSM 14759	?	L	128.8	5.19	16.7	13.8
Bubo virginianus	Great Horned Owl	NCSM 6191	?	L	127.2	5.4	17	14
Bubo virginianus	Great Horned Owl	NCSM 6294	?	L	122.42	5.27	15.5	13.4
Bubo virginianus	Great Horned Owl	NCSM 6427	?	R	123.15	4.85	13.2	14.1
Bubo scandiacus	Snowy Owl	USNM 491639	♂	L	110.1	6.9	15.7	12.5
Bubo scandiacus	Snowy Owl	USNM 226105	♂	L	112.3	6.3	15.5	12.9
Bubo scandiacus	Snowy Owl	USNM 614342	♀	L	122.1	7.2	17.6	13.9
Bubo scandiacus	Snowy Owl	USNM 639074	♂	L	113.4	6.1	14.9	12.9
Bubo scandiacus	Snowy Owl	NCSM 5251	♂	R	117.58	5.12	15.4	12.7
Bubo africanus	Spotted Eagle-owl	USNM 431906	♂	L	111.96	6.2	11.4	9.7
Bubo africanus	Spotted Eagle-owl	USNM 318507	♀	L	1.5.6	5.9	11.6	9.7
Bubo africanus	Spotted Eagle-owl	USNM 430391	♂	L	108.9	6.3	11.8	9.7
Bubo africanus	Spotted Eagle-owl	USNM 391453	♀	L	106.8	6	12.1	10.5
Bubo philippensis	Phillipine Eagle-owl	USNM 489264	♀	L	122.8	7.5	17	14.9
Bubo lacteus	Verreaux's Eagle-owl	USNM 430407	♂	L	145.7	7.6	18.8	16
Bubo sumatranus	Barred Eagle-owl	USNM 559827	?	L	100.9	5.9	13.9	11.7
Bubo ketupu	Buffy Fish Owl	USNM 559828	♀	L	124.1	5.5	13.3	11.5
Bubo zeylonensis	Brown Fish Owl	USNM 429219	♀	L	131	6.8	15.3	11.8
Bubo zeylonensis	Brown Fish Owl	USNM 631756	♂	L	131.5	6.6	15.7	12.6
Strix albitarsis	Rufous-banded Owl	USNM 614840	♂	L	79.2	3.8	9.1	7.9
Ciccaba virgata	Mottled Owl	USNM 635053	♀	L	80.1	4	10.1	8.4
Ciccaba virgata	Mottled Owl	USNM 502273	♂	L	82.9	4.1	9.1	7.7
Ciccaba nigrolineata	Black-and-white Owl	USNM 613976	♀	L	93.7	4.5	11	9.8
Ciccaba nigrolineata	Black-and-white Owl	USNM 613368	♂	L	93.5	3.8	10.4	9.2
Ciccaba nigrolineata	Black-and-white Owl	USNM 562545	♀	L	94	4.5	10.6	9.1
Ciccaba nigrolineata	Black-and-white Owl	USNM 613367	♂	L	95.1	4	10.3	8.8
Strix aluco	Tawny Owl	USNM 621334	♂	L	79.8	4	9.3	7.6
Strix aluco	Tawny Owl	USNM 621335	♂	L	80.7	4	9.1	7.8
Strix aluco	Tawny Owl	USNM 559072	♀	L	88.4	4.7	10.2	8.8
Strix aluco	Tawny Owl	USNM 610399	♀	L	85.4	4.6	10	8.4
Strix occidentalis	Spotted Owl	USNM 608652	♂	L	95.4	4.6	10.4	9
Strix occidentalis	Spotted Owl	NCSM 19444	?	L	94.86	3.73	10.8	9
Strix occidentalis	Spotted Owl	USNM 489991	♀	L	93.5	4.3	10	8.3
Strix occidentalis	Spotted Owl	USNM 622464	?	L	96.4	5.1	11.7	9.6
Strix woodfordii	African Wood Owl	USNM 491216	♀	L	76	3.5	8.3	6.7
Strix woodfordii	African Wood Owl	USNM 318593	♂	L	80.6	3.8	8.7	7.3
Strix woodfordii	African Wood Owl	USNM 322442	♀	L	81.8	3.2	8.1	7
Strix woodfordii	African Wood Owl	USNM 318592	♀	L	77.4	3.6	8.9	7.3
Strix nebulosa	Great Gray Owl	USNM 610411	?	L	120.56	4.45	14.7	11.5
Strix nebulosa	Great Gray Owl	USNM 289429	♀	L	125.9	6.87	15.5	12.5
Strix nebulosa	Great Gray Owl	USNM 502543	♂	L	106.59	3.88	13	10.6
Strix nebulosa	Great Gray Owl	USNM 556948	♀	L	120.34	4.79	14.7	12.2
Strix nebulosa	Great Gray Owl	USNM 289980	♀	L	119.89	4.63	14.7	11.7
Strix varia	Barred Owl	NCSM 9493	♂	L	107.1	3.98	11.2	9.9
Strix varia	Barred Owl	NCSM 16254	♂	R	106.95	3.59	11.7	10.3
Strix varia	Barred Owl	NCSM 22388	♂	L	104.78	3.79	11.8	9.5
Strix varia	Barred Owl	NCSM 16843	♂	L	105.78	3.64	12.3	10.4
Strix varia	Barred Owl	NCSM 16529	♂	L	106.68	4.13	12.2	10.5
Strix varia	Barred Owl	NCSM 9973	?	L	102.95	3.77	11.4	9.8
Strix varia	Barred Owl	NCSM 19159	♀	R	108.3	4	12.3	10.5
Strix varia	Barred Owl	NCSM 21031	♀	R	105	3.74	12.6	10.3
Strix varia	Barred Owl	NCSM 22389	♀	R	107.91	3.94	12.6	10.7
Strix varia	Barred Owl	NCSM 21849	♀	R	104.55	3.7	12.1	10.1
Strix otus	Long-eared Owl	NCSM 16668	♂	L	77.24	2.84	8.4	6.9
Strix otus	Long-eared Owl	FMNH 363906	♂	L	78.3	3.9	8.5	7.3
Strix otus	Long-eared Owl	FMNH 437492	♀	L	81.6	3.7	9	7.5
Strix otus	Long-eared Owl	FMNH 379265	♀	L	76.3	3.5	8.1	6.7
Strix uralensis	Ural Owl	USNM 610400	♂	L	98.8	4.9	12.1	10.1
Strix uralensis	Ural Owl	USNM 610401	♂	L	101.7	5.3	12.4	10.1
Strix uralensis	Ural Owl	USNM 610405	♀	L	103	5.9	13.3	10.5
Strix uralensis	Ural Owl	USNM 610403	♀	L	102.6	6.1	14.1	11.2
Lophostrix cristata	Crested Owl	USNM 429196	♀	L		4.1	10.2	8.8
Micrathene whitneyi	Elf Owl	FMNH 337248	♀	L	37.5	1.8	4	3.2
Micrathene whitneyi	Elf Owl	NCSM 19574	?	R	39.15	1.7	3.8	3.3
Micrathene whitneyi	Elf Owl	NCSM 20178	?	L	37.43	1.83	4.1	3.5
Megascops asio	Eastern Screech Owl	NCSM 16336	♂	R	51.97	2.18	6	5.1
Megascops asio	Eastern Screech Owl	NCSM 8633	♂	L	53.33	2.05	6.6	5.4
Megascops asio	Eastern Screech Owl	NCSM 16872	♂	L	53.57	2.27	6.5	5.2
Megascops asio	Eastern Screech Owl	NCSM 18369	♂	R	55.96	2.24	6.8	5.9
Megascops asio	Eastern Screech Owl	NCSM 22387	♀	R	54.49	2.33	6.2	5.3
Megascops asio	Eastern Screech Owl	NCSM 10880	♀	R	54.41	2.02	6.5	5.4
Megascops asio	Eastern Screech Owl	NCSM 10055	♀	L	53.18	2.42	6.6	5.4
Megascops asio	Eastern Screech Owl	NCSM 6192	♀	R	55.73	2.24	6.8	5.7
Megascops asio	Eastern Screech Owl	NCSM 9037	♀	R	54.6	2.37	6.8	5.7
Megascops nudipes	Puerto Rican Screech Owl	USNM 50879	?	L	59.4	2.7	6.1	5.3
Megascops nudipes	Puerto Rican Screech Owl	USNM 500237	?	L	62.3	2.6	6.6	5.6
Megascops nudipes	Puerto Rican Screech Owl	USNM 562457	♂	L	63.1	2.8	6.6	5.6
Megascops nudipes	Puerto Rican Screech Owl	USNM 501734	♀	L	56.2	2.4	5.9	4.9
Megascops kennicottii	Western Screech Owl	USNM 637702	♀	L	55.8	2.8	7.1	6
Megascops kennicottii	Western Screech Owl	USNM 561889	♀	L	60	3.2	7.6	6.6
Megascops kennicottii	Western Screech Owl	USNM 561886	♂	L	57.4	3	7.2	6.1
Megascops kennicottii	Western Screech Owl	USNM 621106	♂	L	59	3.1	7.7	6.5
Megascops watsoni	Tawny-bellied Screech Owl	USNM 622354	♂	L	56.9	2.7	7.1	5.5
Megascops watsoni	Tawny-bellied Screech Owl	USNM 562193	♂	L	54.6	3	6.4	5.5
Megascops watsoni	Tawny-bellied Screech Owl	USNM 562192	♂	L	56.5	2.5	6.7	5
Megascops watsoni	Tawny-bellied Screech Owl	FMNH 330260	♀	L	59.4	2.9	7.4	5.8
Megascops choliba	Tropical Screech Owl	USNM 622380	♂	L	54.5	2.5	5.9	5
Megascops choliba	Tropical Screech Owl	USNM 631151	♂	L	54.2	2.6	6.5	5.3
Megascops choliba	Tropical Screech Owl	USNM 620775	♂	L	54.4	2.4	6.1	5.1
Megascops choliba	Tropical Screech Owl	USNM631049	♂	L	55.6	2.5	6	5.1
Megascops clarkii	Bare-shanked Screech Owl	USNM 18957	?	L	58.4	2.6	6.7	5.5
Megascops trichopsis	Whiskered Screeech Owl	USNM 554125	♀	L	47.6	2.2	5.5	4.6
Megascops ingens	Rufescent Screech Owl	FMNH 39726	♂	L	60	2.9	7.2	5.6
Megascops ingens	Rufescent Screech Owl	FMNH 320451	♂	L	62.3	3.2	7.1	5.8
Megascops cooperi	Pacific Screech Owl	FMNH 337233	?	L	56.5	2.9	7	5.6
Megascops guatemale	Middle-American Screech Owl	FMNH 320447	♀	L	53.9	2.7	6.3	5.1
Megascops petersoni	Cinnamon Screech Owl	USNM 560060	♂	L	48	2.3	6.1	4.9
Megascops atricapillus	Black-capped Screech Owl	USNM 555942	♂	L	54.3	2.8	6.2	5
Otus leucotis	Northern White-faced Owl	FMNH 319974	♂	L	65.2	3	7.4	6.5
Otus leucotis	Northern White-faced Owl	USNM 18949	?	L	67.4	3.4	8.4	7.3
Otus scops	Eurasian Scops Owl	USNM 603585	♀	L	49.6	2.4	5.7	4.7
Otus scops	Eurasian Scops Owl	USNM 552942	♀	L	46.1	2.1	5.4	4.3
Otus scops	Eurasian Scops Owl	USNM 603588	♂	L	46.3	2.2	5.4	4.2
Otus scops	Eurasian Scops Owl	USNM 603590	♂	L	43.9	2	5.3	3.9
Otus elegans	Ryuku Scops Owl	USNM 560671	♂	L	57.4	2.5	6.1	5
Otus elegans	Ryuku Scops Owl	USNM 560673	♂	L	54.8	2.5	6.2	5.1
Otus elegans	Ryuku Scops Owl	USNM 560672	♂	L	52.5	2.5	6	4.9
Otus elegans	Ryuku Scops Owl	USNM 560674	♀	L	55.8	2.5	6.5	5.3
Otus magicus	Moluccan Scops Owl	USNM 557175	♂	L	57.2	2.7	6.9	5.5
Otus magicus	Moluccan Scops Owl	USNM 557174	♂	L	60.1	2.7	6.9	5.7
Otus magicus	Moluccan Scops Owl	USNM 557176	♀	L	57.3	2.7	6.7	5.8
Otus magicus	Moluccan Scops Owl	USNM 557179	♀	L	57.6	2.8	7	5.3
Otus bakkamoena	Indian Scops Owl	USNM 562868	♂	L	55.8	2.5	6.3	5.4
Otus bakkamoena	Indian Scops Owl	USNM 343257	♂	L	56.7	2.8	6.6	5.5
Otus bakkamoena	Indian Scops Owl	USNM 562892	♀	L	58.1	2.8	7	6
Otus bakkamoena	Indian Scops Owl	USNM 343258	♀	L	58.1	2.8	6.6	5.4
Otus longicornis	Luzon Scops Owl	FMNH 387738	♀	L	51.7	2.2	5.5	4.4
Otus rutilus	Rainforest Scops Owl	FMNH 393150	?	L	51.9	2.5	5.9	4.7
Otus rutilus	Rainforest Scops Owl	FMNH 352803	♀	L	54.5	2.6	5.9	4.9
Gymnoglaux lawrencii	Bare-legged Owl	USNM 54236	♀	L	53.2	2.4	5.6	4.4
Gymnoglaux lawrencii	Bare-legged Owl	USNM 554287	♀	L	54.5	2.5	5.6	4.8
Ninox novaeseelandiae	Morepork	USNM 620226	♀	L	75.6	4.1	9.2	7.7
Ninox novaeseelandiae	Morepork	USNM 620227	♂	L	77.9	3.9	8.7	7.7
Ninox novaeseelandiae	Morepork	USNM 492457	♀	L	84.2	4.1	9.1	7.7
Ninox novaeseelandiae	Morepork	USNM 492459	♂	L	79.3	4	8.2	7.5
Ninox scutulata	Brown Hawk-owl	USNM 343263	♂	L	63.1	3	6.7	5.9
Ninox scutulata	Brown Hawk-owl	USNM 343047	♂	L	60.1	3.2	7	5.7
Ninox scutulata	Brown Hawk-owl	USNM 560815	♂	L	60.3	3	6.7	5.8
Ninox variegata	Bismarck Hawk-owl	USNM 615020	♂	L	63.5	3	7	5.9
Ninox variegata	Bismarck Hawk-owl	USNM 615019	♀	L	60.6	3.3	7.5	6.1
Ninox philippensis	Luzon Hawk-owl	USNM 613057	♂	L	57.8	2.6	6	5.2
Ninox philippensis	Luzon Hawk-owl	USNM 613697	♀	L	55.9	2.7	6.2	5
Glaucidium brodiei	Collared Owlet	USNM 559829	♂	L	37.6	2.2	4.9	4.2
Glaucidium brodiei	Collared Owlet	USNM 611823	♀	L	38.5	2.3	4.6	4.3
Glaucidium cuculoides	Asian Barred Owlet	USNM 289958	♂	L	57.1	3.4	7.6	6.2
Glaucidium cuculoides	Asian Barred Owlet	USNM 291711	♀	L	56.6	3.4	8	6.8
Glaucidium passerinum	Eurasian Pygmy Owl	USNM 610392	♂	L	34.9	2	4.6	3.7
Glaucidium passerinum	Eurasian Pygmy Owl	USNM 610393	♀	L		2.4	5.1	4.1
Glaucidium perlatum	Pearl-spotted Owlet	FMNH 313715	♀	L	46.2	2.7	6.2	5.2
Glaucidium perlatum	Pearl-spotted Owlet	FMNH 319977	♀	L	44.2	2.6	6	4.8
Glaucidium perlatum	Pearl-spotted Owlet	FMNH 319979	♂	L	46.1	2.6	6	5.1
Glaucidium perlatum	Pearl-spotted Owlet	FMNH 319978	♂	L	48.4	2.4	4.9	4.2
Glaucidium brasilianum	Ferruginous Pygmy Owl	FMNH 337247	♂	L	39.5	2	5.1	4.5
Glaucidium brasilianum	Ferruginous Pygmy Owl	FMNH 320456	♀	L	40	2.3	5.5	4.7
Glaucidium brasilianum	Ferruginous Pygmy Owl	FMNH 315173	♂	L	39.6	2.2	5.2	4.4
Glaucidium jardinii	Andean Pygmy Owl	FMNH 433068	♂	L	40.9	2.1	5.3	4.4
Glaucidium jardinii	Andean Pygmy Owl	FMNH 291746	♀	L	40.4	2.1	5.2	4.4
Glaucidium siju	Cuban Pygmy Owl	FMNH 376535	♀	L	38.8	2.2	5.7	5.4
Glaucidium siju	Cuban Pygmy Owl	FMNH 376534	♀	L	39.6	2.3	4.7	3.9
Surnia ulula	Northern Hawk-owl	USNM 289974	♂	L	66.2	3.9	8.3	7.2
Surnia ulula	Northern Hawk-owl	USNM 290337	♂	L	63.2	4	8.6	7.1
Surnia ulula	Northern Hawk-owl	USNM 610389	♀	L	63.3	3.9	9.2	7.1
Surnia ulula	Northern Hawk-owl	USNM 289421	?	L	64	3.8	9.3	7.4
Pseudoscops clamator	Striped Owl	USNM 347339	?	L	88.1	4	9.3	8.4
Pseudoscops grammicus	Jamaican Owl	USNM 559184	?	L	81.3	3.9	9	7.5
Pseudoscops grammicus	Jamaican Owl	USNM 559185	♀	L	81.3	4.3	9.3	8.1
Pulsatrix perspicillata	Spectacled Owl	USNM 637218	♂	L	97.5	5.3	12.2	10.2
Pulsatrix perspicillata	Spectacled Owl	USNM 345889	♂	L	97.6	5.2	12.3	10.5
Pulsatrix perspicillata	Spectacled Owl	USNM 18350	?	L	104.5	5.6	12.9	12.1
Pulsatrix perspicillata	Spectacled Owl	USNM 320862	♀	L	99.3	5.7	13.4	11.8
Phodilus badius	Oriental Bay Owl	USNM 20310	♂	L	71.3	3.7	9.4	8.5
Tyto alba	Barn Owl	NCSM 6613	♀	R	104.63	4.61	10.3	11.5
Tyto alba	Barn Owl	NCSM 16225	♂	R	104.3	3.95	10.3	10.4
Tyto alba	Barn Owl	NCSM 16795	♂	R	103.45	4.24	10.8	10.4
Tyto alba	Barn Owl	NCSM 16796	♀	R	112.76	4.27	12.2	11.1
Tyto alba	Barn Owl	NCSM 16886	♀	R	105.99	3.93	10.1	10.6
Tyto alba	Barn Owl	NCSM 16888	♂	L	107.31	4.1	10.1	10.6
Tyto glaucops	Ashy-faced Owl	USNM 226469	?	L	97.8	4.2	10.6	9.2
Tyto glaucops	Ashy-faced Owl	USNM 553423	?	L	88.7	4.6	9.1	9.3
Tyto glaucops	Ashy-faced Owl	USNM 288593	?	L	93.8	5	10.4	9.9
Tyto capensis	African Grass Owl	USNM 560528	?	L	93	5	9.1	9.1
Tyto capensis	African Grass Owl	NA-see diet column
EXTINCT OWLS
†Tyto gigantea	Giant Barn Owl	Nr 177 687	?	R	195	9.7
†Tyto noeli	Noels Barn Owl	OA 827	?	R	~147	6.4
†Ornimegalonyx oteroi	Arredondo's Owl	SEC P-383.E	?	L&R	~250	13
†Grallistrix auceps	Bird-catching Stilt Owl	USNM 386228	?	L	110.8	4.9	10.2	8.7
†Grallistrix orion	Hunting Stilt Owl	USNM 435161	?	L&R	101.9	4.2	9.6	7.9
†Grallistrix erdmani	Erman's Stilt Owl	USNM 426129	?	R	96	4.6	9.2	7.5
†Eostrix mimica	Eocene Mimic Owl	USNM 15156	?	R		6	11.4	9.7
† Necrobyas arvernensis	Milne Edwards 1863		?		77.9	4.3	10
†cf. Selenornithinae	Jebel Owl	DPC 24780	?	L	*32.1	9.7	13.6	14.7
ASST. GIANT TAXA
Diomedea exulans	Wandering Albatross	FMNH 339599	?	L	220.38	12.1	21.4	22.6
Ardeotis kori	Kori Bustard	FMNH 377823	♂	L	303.4	14.2	24.9	26
Vultur gryphus	Andean Condor	FMNH 104696	♂	R	246.96	14.2	26	25.5
†Argentavis magnificens	Giant Teratorn	MLP 65-VII-29-49	?	na		27.53
†Pelagornis chilensis	Chilean Pseudotooth	MNHN SGO.PV 1061	?	L	242.2	20.4	36.1
†Harpagornis moorei	Haast's Eagle	see Holdaway 1991	?	NA	235.75	13.95	34.5	16.9
